# Supplementary material
Source: ML conference proceedings conference paper supplement (https://proceedings.mlr.press/v130/yang21c.html)
Supplement: Supplementary file 1 [file yang21c-supp.pdf]

## A Supplementary

### A.1 Supporting Theorems and Lemmas

Let us recall the excess risk of a randomized algorithm  $\mathcal{A}$  defined as  $\epsilon_{\text{risk}}(\mathcal{A}(S)) = R(\mathcal{A}(S)) - R(\mathbf{w}_*)$ , which can be decomposed by

$$\epsilon_{\text{risk}}(\mathcal{A}(S)) = R(\mathcal{A}(S)) - R_S(\mathcal{A}(S)) + R_S(\mathbf{w}_*) - R(\mathbf{w}_*) + R_S(\mathcal{A}(S)) - R_S(\mathbf{w}_*). \quad (\text{A.14})$$

Hence, before introducing the proofs we will give some theorems and lemmas that are repeatedly used to bound each term in Equation (A.14).

Here we simply assume bounds for  $\|\mathbf{w}\|$ . A simple lemma indicates that if  $\mathbf{w}$  is bounded, then  $\ell(\mathbf{w}, \cdot, \cdot)$  is also bounded. In the subsequent sections, we will characterize the bounds for the iterates  $\{\mathbf{w}_t\}$  whenever the parameter space  $\mathcal{W}$  is bounded or unbounded.

**Lemma A.6.** *Suppose  $\ell$  is nonnegative, convex and  $G$ -Lipschitz. Let  $M = \sup_{\mathbf{z}, \mathbf{z}'} \ell(0, \mathbf{z}, \mathbf{z}')$ . For any  $\mathbf{w} \in \mathcal{W}$  that  $\mathbf{w} \leq B$  for some  $0 \leq B < \infty$ , then  $\sup_{\mathbf{z}, \mathbf{z}'} \ell(\mathbf{w}, \mathbf{z}, \mathbf{z}') \leq M + GB$ .*

*Proof.* By convexity of  $\ell$ , we have for any  $\mathbf{z}, \mathbf{z}'$

$$\ell(\mathbf{w}, \mathbf{z}, \mathbf{z}') \leq \sup_{\mathbf{z}, \mathbf{z}'} \ell(0, \mathbf{z}, \mathbf{z}') + \langle \mathbf{w}, \partial \ell(\mathbf{w}, \mathbf{z}, \mathbf{z}') \rangle \leq M + \|\mathbf{w}\| \|\partial \ell(\mathbf{w}, \mathbf{z}, \mathbf{z}')\|_2 \leq M + GB$$

where the second inequality is due to Cauchy-Schwarz inequality. The proof is complete by taking the supremum.  $\square$

The first theorem in this section is the the high probability generalization bound of UAS algorithms in pairwise learning. This theorem is an extension of Theorem 1 in [Lei et al. \(2020\)](#) for generalization bound of uniformly stable algorithms in pairwise learning.

**Theorem A.6.** *Suppose  $\ell$  is nonnegative, convex and  $G$ -Lipschitz. Let  $\mathcal{A}$  be a  $\epsilon$ -UAS randomized algorithm for pairwise learning. Suppose the output of  $\mathcal{A}$  is bounded by  $B$  and let  $M = \sup_{\mathbf{z}, \mathbf{z}'} \ell(0, \mathbf{z}, \mathbf{z}')$ . Then we have for any  $\gamma \in (0, 1)$ , with probability at least  $1 - \gamma$  with respect to the sample  $S$  and the internal randomness of  $\mathcal{A}$ ,*

$$R(\mathcal{A}(S)) - R_S(\mathcal{A}(S)) \leq 4\epsilon + 48\sqrt{6}eG\epsilon[\ln(n)] \ln(e/\gamma) + 12\sqrt{2}e(M + GB)\sqrt{\frac{\ln(e/\gamma)}{n}}.$$

*Proof.* According to Theorem 1 in [Lei et al. \(2020\)](#), we only need to check the expected boundedness of  $\ell(\mathcal{A}(S), \cdot, \cdot)$  and the uniform stability of  $\mathcal{A}$ . For the boundedness part, by Lemma [A.6](#) we know

$$|\mathbb{E}[\ell(\mathcal{A}(S), \mathbf{z}, \mathbf{z}')]| \leq M + GB$$

for any  $\mathbf{z}, \mathbf{z}'$ . For the uniform stability, since  $\mathcal{A}$  is  $\epsilon$ -UAS, by the Lipschitz continuity of  $\ell$  we have

$$\sup_{\mathbf{z}, \mathbf{z}'} |\ell(\mathcal{A}(S), \mathbf{z}, \mathbf{z}') - \ell(\mathcal{A}(S'), \mathbf{z}, \mathbf{z}')| \leq G\|\mathcal{A}(S) - \mathcal{A}(S')\|_2 \leq G\epsilon.$$

The proof is complete.  $\square$

The next corollary is a direct application of Theorem [A.6](#), which states if UAS holds with high probability, then so is the generalization.

**Corollary A.5.** *Let  $\mathcal{A}$  be a randomized algorithm for pairwise learning. If for any  $\gamma_0 \in (0, 1)$ , we have, for any neighborhood datasets  $S, S'$ ,*

$$\mathbb{P}_{\mathcal{A}} \left[ \|\mathcal{A}(S) - \mathcal{A}(S')\|_2 > \epsilon \right] \leq \gamma_0.$$

*Suppose  $\ell$  is nonnegative, convex and  $G$ -Lipschitz. Suppose the output of  $\mathcal{A}$  is bounded by  $B$  and let  $M = \sup_{\mathbf{z}, \mathbf{z}'} \ell(0, \mathbf{z}, \mathbf{z}')$ . Then we have for any  $\gamma \in (0, 1)$ ,*

$$\mathbb{P}_{S, \mathcal{A}} \left[ R(\mathcal{A}(S)) - R_S(\mathcal{A}(S)) > 4\epsilon + 48\sqrt{6}eG\epsilon[\ln(n)] \ln(e/\gamma) + 12\sqrt{2}e(M + GB)\sqrt{\frac{\ln(e/\gamma)}{n}} \right] \leq \gamma + \gamma_0.$$

*Proof.* Denote  $E = \{\mathcal{A} \|\mathcal{A}(S) - \mathcal{A}(S')\|_2 > \epsilon\}$  and  $F = \{S, \mathcal{A} | R(\mathcal{A}(S)) - R_S(\mathcal{A}(S)) > 4\epsilon + 48\sqrt{6}eG\epsilon \lceil \ln(n) \rceil \ln(e/\gamma) + 12\sqrt{2}e(M + GB)\sqrt{\ln(e/\gamma)/n}\}$ . Then by assumption we have  $\mathbb{P}_{\mathcal{A}}[\mathcal{A} \in E] \leq \gamma_0$ . By Theorem [A.6](#), for any  $\gamma \in (0, 1)$ , we have  $\mathbb{P}_{S, \mathcal{A}}[S, \mathcal{A} \in F | \mathcal{A} \notin E] \leq \gamma$ . Then the following identity holds

$$\begin{aligned} \mathbb{P}_{S, \mathcal{A}}[S, \mathcal{A} \in F] &= \mathbb{P}_{S, \mathcal{A}}[S, \mathcal{A} \in F \cap \mathcal{A} \in E] + \mathbb{P}_{S, \mathcal{A}}[S, \mathcal{A} \in F \cap \mathcal{A} \notin E] \\ &= \mathbb{P}_{S, \mathcal{A}}[S, \mathcal{A} \in F | \mathcal{A} \in E] \mathbb{P}[\mathcal{A} \in E] + \mathbb{P}_{S, \mathcal{A}}[S, \mathcal{A} \in F | \mathcal{A} \notin E] \mathbb{P}[\mathcal{A} \notin E] \\ &\leq \gamma_0 + \gamma. \end{aligned}$$

The proof is completed.  $\square$

Combining Corollary [A.5](#) and the stability result in Theorem [1](#), we arrive at the following generalization bound for Algorithm [1](#)

**Corollary A.6.** *Suppose  $\ell$  is nonnegative, convex and  $G$ -Lipschitz. Let  $B_T = \|\bar{\mathbf{w}}_T\|$  and  $M = \sup_{\mathbf{z}, \mathbf{z}'} \ell(0, \mathbf{z}, \mathbf{z}')$ . If we run Algorithm [1](#) for  $T \geq n$  iterations under random selection with replacement rule. For any  $\gamma \in (0, 1)$ , with probability at least  $1 - \gamma$  with respect to the sample  $S$  and the internal randomness of Algorithm [1](#), we have*

$$R(\bar{\mathbf{w}}_T) - R_S(\bar{\mathbf{w}}_T) \leq 2\sqrt{\epsilon} \eta G (4 + 48\sqrt{6}eG \lceil \ln(n) \rceil \ln(2e/\gamma)) \left( \sqrt{T} + \frac{\sqrt{3T \ln(eT) \ln(2/\gamma)}}{n} \right) + 12\sqrt{2}e(M + GB_T) \sqrt{\frac{\ln(2e/\gamma)}{n}}.$$

*Proof.* By Theorem [1](#), elementary inequality and the fact that stability is monotonically increasing, we have with probability at least  $1 - \gamma/2$ ,

$$\|\bar{\mathbf{w}}_T - \bar{\mathbf{w}}'_T\|_2^2 \leq 4e\eta^2 G^2 \left( T + \frac{3T^2 \ln^2(eT) \ln^2(2/\gamma)}{n^2} \right).$$

The proof is completed by convexity of  $\|\cdot\|_2$  and applying Theorem [A.6](#) with probability  $1 - \frac{\gamma}{2}$ .  $\square$

The next theorem gives a bound on  $R_S(\mathbf{w}_*) - R(\mathbf{w}_*)$  by Hoeffding inequality of U-statistics [Hoeffding \(1963\)](#).

**Theorem A.7.** *Suppose  $\ell$  is convex and  $G$ -Lipschitz. Let  $M = \sup_{\mathbf{z}, \mathbf{z}'} \ell(0, \mathbf{z}, \mathbf{z}')$  and  $B = \|\mathbf{w}_*\|_2$ . For any  $\gamma \in (0, 1)$ , with probability at least  $1 - \gamma$  with respect to the sample  $S$ , we have*

$$R_S(\mathbf{w}_*) - R(\mathbf{w}_*) \leq (M + GB) \sqrt{\frac{\ln(1/\gamma)}{n}}.$$

*Proof.* The result is derived by applying Hoeffding inequality since  $\ell(\mathbf{w}_*, \mathbf{z}, \mathbf{z}') \leq M + GB$  for any  $\mathbf{z}, \mathbf{z}'$  according to Lemma [A.6](#).  $\square$

Next we give an upper bound on the optimization error  $R_S(\bar{\mathbf{w}}_T) - R_S(\mathbf{w}_*)$ . The results are inspired by [Kar et al. \(2013\)](#), where they consider the online-to-batch generalization bound for pairwise learning. Our bound in the next theorem is given for optimization bound on finite sample.

**Theorem A.8.** *Suppose  $\ell$  is nonnegative, convex and  $G$ -Lipschitz. Suppose there are some non-decreasing sequence  $0 \leq B_t < \infty$  such that  $\|\mathbf{w}_t\|_2 \leq B_t$ , and let  $M = \sup_{\mathbf{z}, \mathbf{z}'} \ell(0, \mathbf{z}, \mathbf{z}')$  and  $B = \|\mathbf{w}_*\|_2$ . Suppose we run Algorithm [1](#) for  $T$  iterations, then with probability at least  $1 - \gamma$  with respect to the sample  $S$  and the internal randomness of Algorithm [1](#), we have*

$$R_S(\bar{\mathbf{w}}_T) - R_S(\mathbf{w}_*) \leq \frac{2}{T} \sum_{t=1}^T \mathcal{R}_t(\ell \circ \mathcal{W}_t) + \frac{2}{T} \sum_{t=1}^T \mathcal{R}_t(\ell \circ \mathcal{W}_B) + \frac{B^2}{2T\eta} + \frac{\eta G^2}{2} + (6M + 3GB) \sqrt{\frac{\ln(2T/\gamma)}{T}} + 3GB_T \sqrt{\frac{\ln(2T/\gamma)}{T}},$$

where  $\mathcal{W}_t = \{\mathbf{w} \in W \mid \|\mathbf{w}\|_2 \leq B_t\}$  and  $\mathcal{W}_B = \{\mathbf{w} \in W \mid \|\mathbf{w}\|_2 \leq B\}$  are subspaces of  $W$ .

In order to prove Theorem [A.8](#), we decompose  $R_S(\bar{\mathbf{w}}_T) - R_S(\mathbf{w}_*)$  as in [Kar et al. \(2013\)](#) and bound each part separately. In particular, recall that  $\hat{L}_{t+1}(\mathbf{w}) = \frac{1}{t} \sum_{k=1}^t \ell(\mathbf{w}, \mathbf{z}_{i_{t+1}}, \mathbf{z}_{i_k})$ . We have the following lemmas.

**Lemma A.7.** *Assume  $\ell$  is nonnegative, convex and  $G$ -Lipschitz. Let  $\mathcal{W}_t = \{\mathbf{w} \in W \mid \|\mathbf{w}\|_2 \leq B_t\}$  and let  $M = \sup_{\mathbf{z}, \mathbf{z}'} \ell(0, \mathbf{z}, \mathbf{z}')$ . With probability  $1 - \gamma$ , we have*

$$\frac{1}{T} \sum_{t=1}^T R_S(\mathbf{w}_t) - \hat{L}_{t+1}(\mathbf{w}_t) \leq \frac{2}{T} \sum_{t=1}^T \mathcal{R}_t(\ell \circ \mathcal{W}_t) + 3(M + GB_T) \sqrt{\frac{\ln(T/\gamma)}{T}}.$$

*Proof.* For any  $\mathbf{w}$ , denote  $\tilde{L}_{t+1}(\mathbf{w}) = \frac{1}{n} \sum_{i=1}^n \frac{1}{t} \sum_{k=1}^t \ell(\mathbf{w}, \mathbf{z}_i, \mathbf{z}_{i_k})$ . This allows us to decompose the risk as follows

$$\frac{1}{T} \sum_{t=1}^T R_S(\mathbf{w}_t) - \hat{L}_{t+1}(\mathbf{w}_t) = \frac{1}{T} \sum_{t=1}^T \underbrace{R_S(\mathbf{w}_t) - \tilde{L}_{t+1}(\mathbf{w}_t)}_{P_{t+1}} + \underbrace{\tilde{L}_{t+1}(\mathbf{w}_t) - \hat{L}_{t+1}(\mathbf{w}_t)}_{Q_{t+1}}$$

By construction, we have  $\mathbb{E}_{\mathbf{z}_{i_{t+1}}} [Q_{t+1} | \mathbf{z}_{i_1}, \dots, \mathbf{z}_{i_t}] = 0$  and hence the sequence  $Q_2, \dots, Q_T$  forms a martingale difference sequence. By Lemma A.6 we have  $Q_{t+1}$  lies in  $[-M - GB_t, M + GB_t] \subseteq [-M - GB_T, M + GB_T]$  as  $B_t$ 's are non-decreasing. An application of the Azuma-Hoeffding inequality shows that with probability at least  $1 - \gamma$ ,

$$\frac{1}{T} \sum_{t=1}^T Q_t \leq (M + GB_T) \sqrt{\frac{2 \ln(1/\gamma)}{T}}.$$

We now analyze each term  $P_t$  individually. Let us start by introducing a ghost sample  $\{\mathbf{z}'_1, \dots, \mathbf{z}'_t\}$ , where each  $\mathbf{z}'_{i_k}$  follows the same distribution as  $\mathbf{z}_{i_k}$ . By linearity of expectation, we have

$$R_S(\mathbf{w}_t) = \mathbb{E} \left[ \frac{1}{n} \sum_{i=1}^n \frac{1}{t} \sum_{k=1}^t \ell(\mathbf{w}_t, \mathbf{z}_i, \mathbf{z}'_{i_k}) \right],$$

where the expectation is taken over  $\{\mathbf{z}'_{i_k}\}_{k=1}^t$ . It allows us to write  $P_t$  as follow

$$\begin{aligned} P_t &= \mathbb{E} \left[ \frac{1}{n} \sum_{i=1}^n \frac{1}{t} \sum_{k=1}^t \ell(\mathbf{w}_t, \mathbf{z}_i, \mathbf{z}'_{i_k}) \right] - \tilde{L}_{t+1}(\mathbf{w}_t) \leq \sup_{\mathbf{w} \in \mathcal{W}_t} \mathbb{E} \left[ \frac{1}{n} \sum_{i=1}^n \frac{1}{t} \sum_{k=1}^t \ell(\mathbf{w}, \mathbf{z}_i, \mathbf{z}'_{i_k}) \right] - \tilde{L}_{t+1}(\mathbf{w}) \\ &\triangleq g_{t+1}(\mathbf{z}_{i_1}, \dots, \mathbf{z}_{i_t}). \end{aligned}$$

Since  $\ell$  is bounded by  $A_t$ , the expression  $g_{t+1}(\mathbf{z}_{i_1}, \dots, \mathbf{z}_{i_t})$  can have a variation of at most  $(M + GB_t)/t$  when changing any of its  $t$  variables. Hence an application of McDiarmid's inequality gives us, with probability at least  $1 - \gamma$ ,

$$g_{t+1}(\mathbf{z}_{i_1}, \dots, \mathbf{z}_{i_t}) \leq \mathbb{E}_{\mathbf{z}_{i_1}, \dots, \mathbf{z}_{i_t}} [g_{t+1}(\mathbf{z}_{i_1}, \dots, \mathbf{z}_{i_t})] + (M + GB_t) \sqrt{\frac{\ln(1/\gamma)}{2t}}.$$

For any  $\mathbf{w} \in \mathcal{W}_t$ , let  $f(\mathbf{w}, \mathbf{z}') = \frac{1}{t} \sum_{i=1}^n \ell(\mathbf{w}, \mathbf{z}_i, \mathbf{z}')$ . Then we can write  $\mathbb{E}_{\mathbf{z}_{i_1}, \dots, \mathbf{z}_{i_t}} [g_{t+1}(\mathbf{z}_{i_1}, \dots, \mathbf{z}_{i_t})]$  as follow

$$\begin{aligned} \mathbb{E}_{\{\mathbf{z}_{i_k}\}} [g_{t+1}(\mathbf{z}_{i_1}, \dots, \mathbf{z}_{i_t})] &= \mathbb{E}_{\{\mathbf{z}_{i_k}\}} \left[ \sup_{\mathbf{w} \in \mathcal{W}_t} \mathbb{E}_{\{\mathbf{z}'_{i_k}\}} \left[ \sum_{k=1}^t f(\mathbf{w}, \mathbf{z}'_{i_k}) \right] - \sum_{k=1}^t f(\mathbf{w}, \mathbf{z}_{i_k}) \right] \\ &\leq \mathbb{E}_{\{\mathbf{z}_{i_k}, \mathbf{z}'_{i_k}\}} \left[ \sup_{\mathbf{w} \in \mathcal{W}_t} \sum_{k=1}^t f(\mathbf{w}, \mathbf{z}'_{i_k}) - \sum_{k=1}^t f(\mathbf{w}, \mathbf{z}_{i_k}) \right] = \mathbb{E}_{\{\mathbf{z}_{i_k}, \mathbf{z}'_{i_k}, \sigma_k\}} \left[ \sup_{\mathbf{w} \in \mathcal{W}_t} \sum_{k=1}^t \sigma_k (f(\mathbf{w}, \mathbf{z}'_{i_k}) - f(\mathbf{w}, \mathbf{z}_{i_k})) \right] \\ &\leq \frac{2}{t} \mathbb{E}_{\{\mathbf{z}_{i_k}, \sigma_k\}} \left[ \sup_{\mathbf{w} \in \mathcal{W}_t} \sum_{k=1}^t \sigma_k \frac{1}{n} \sum_{i=1}^n \ell(\mathbf{w}, \mathbf{z}_i, \mathbf{z}_{i_k}) \right] \leq \frac{2}{t} \frac{1}{n} \sum_{i=1}^n \mathbb{E}_{\{\mathbf{z}_{i_k}, \sigma_k\}} \left[ \sup_{\mathbf{w} \in \mathcal{W}_t} \sum_{k=1}^t \sigma_k \ell(\mathbf{w}, \mathbf{z}_i, \mathbf{z}_{i_k}) \right] = 2\mathcal{R}_t(\ell \circ \mathcal{W}_t). \end{aligned}$$

Thus we have, with probability at least  $1 - \gamma$ ,

$$P_t \leq 2\mathcal{R}_t(\ell \circ \mathcal{W}_t) + (M + GB_t) \sqrt{\frac{\ln(1/\gamma)}{2t}}.$$

The Lemma holds by applying a union bound on  $P_t$  and taking the average over  $t$ .  $\square$

**Lemma A.8.** *Suppose  $\ell$  is nonnegative, convex and  $G$ -Lipschitz. Let  $\mathcal{W}_B = \{\mathbf{w} \in \mathcal{W} \mid \|\mathbf{w}\|_2 \leq B\}$  and let  $M = \sup_{\mathbf{z}, \mathbf{z}'} \ell(0, \mathbf{z}, \mathbf{z}')$ . With probability  $1 - \gamma$ , we have*

$$\frac{1}{T} \sum_{t=1}^T \hat{L}_{t+1}(\mathbf{w}_*) - R_S(\mathbf{w}_*) \leq \frac{2}{T} \sum_{t=1}^T \mathcal{R}_t(\ell \circ \mathcal{W}_B) + 3(M + GB) \sqrt{\frac{\ln(T/\gamma)}{T}}.$$

*Proof.* Similar to the proof of Lemma [A.7](#) by replacing  $\mathbf{w}_t$  with  $\mathbf{w}_*$ .  $\square$

**Lemma A.9.** *Suppose  $\ell$  is nonnegative, convex and  $G$ -Lipschitz. Suppose  $\|\mathbf{w}_*\|_2 \leq B$ . Suppose we run Algorithm [1](#) for  $T$  iterations, then we have*

$$\frac{1}{T} \sum_{t=1}^T \hat{L}_{t+1}(\mathbf{w}_t) - \hat{L}_{t+1}(\mathbf{w}_*) \leq \frac{B^2}{2T\eta} + \frac{\eta G^2}{2}$$

*Proof.* By the update rule of Algorithm [1](#), we have

$$\begin{aligned} \|\mathbf{w}_{t+1} - \mathbf{w}_*\|_2^2 &= \|\mathbf{w}_t - \eta \partial \hat{L}_{t+1}(\mathbf{w}_t) - \mathbf{w}_*\|_2^2 = \|\mathbf{w}_t - \mathbf{w}_*\|_2^2 + \eta^2 \|\partial \hat{L}_{t+1}(\mathbf{w}_t)\|_2^2 - 2\eta \langle \mathbf{w}_t - \mathbf{w}_*, \partial \hat{L}_{t+1}(\mathbf{w}_t) \rangle \\ &\leq \|\mathbf{w}_t - \mathbf{w}_*\|_2^2 + \eta^2 G^2 - 2\eta \langle \mathbf{w}_t - \mathbf{w}_*, \partial \hat{L}_{t+1}(\mathbf{w}_t) \rangle. \end{aligned}$$

Therefore, by the convexity of  $\hat{L}_{t+1}$ , we have

$$\begin{aligned} \sum_{t=1}^T \hat{L}_{t+1}(\mathbf{w}_t) - \hat{L}_{t+1}(\mathbf{w}_*) &\leq \sum_{t=1}^T \langle \mathbf{w}_t - \mathbf{w}_*, \partial \hat{L}_{t+1}(\mathbf{w}_t) \rangle \leq \sum_{t=1}^T \frac{\|\mathbf{w}_t - \mathbf{w}_*\|_2^2 - \|\mathbf{w}_{t+1} - \mathbf{w}_*\|_2^2}{2\eta} + \frac{T\eta G^2}{2} \\ &\leq \frac{\|\mathbf{w}_*\|_2^2}{2\eta} + \frac{\eta G^2}{2}, \end{aligned}$$

the Lemma holds by dividing  $T$  over both sides.  $\square$

*Proof of Theorem [A.8](#).* By the convexity of the empirical loss  $R_S$ , we have

$$\begin{aligned} R_S(\bar{\mathbf{w}}_T) - R_S(\mathbf{w}_*) &\leq \frac{1}{T} \sum_{t=1}^T R_S(\mathbf{w}_t) - R_S(\mathbf{w}_*) \\ &= \frac{1}{T} \sum_{t=1}^T (R_S(\mathbf{w}_t) - \hat{L}_{t+1}(\mathbf{w}_t) + \hat{L}_{t+1}(\mathbf{w}_*) - R_S(\mathbf{w}_*) + \hat{L}_{t+1}(\mathbf{w}_t) - \hat{L}_{t+1}(\mathbf{w}_*)). \end{aligned} \quad (\text{A.15})$$

The conclusion follows from Lemma [A.7](#) [A.8](#) both with probability  $1 - \gamma/2$  and Lemma [A.9](#).  $\square$

## A.2 Proof of Theorem [2](#)

**Theorem A.9** (Theorem [2](#) restated). *Suppose  $\ell$  is nonnegative, convex and  $G$ -Lipschitz. Suppose  $\mathcal{W}$  is bounded with diameter  $D$  and let  $M = \sup_{\mathbf{z}, \mathbf{z}'} \ell(0, \mathbf{z}, \mathbf{z}')$ . Assume we run Algorithm [1](#) for  $T \geq n$  iterations under random selection with replacement rule. For any  $\gamma \in (0, 1)$ , with probability at least  $1 - \gamma$ , with respect to the sample  $S$  and the internal randomness of Algorithm [1](#), we have*

$$\begin{aligned} R(\bar{\mathbf{w}}_T) - R(\mathbf{w}_*) &\leq \frac{4}{T} \sum_{t=1}^T \mathcal{R}_t(\ell \circ \mathcal{W}) + \frac{D^2}{2T\eta} + \frac{\eta G^2}{2} + 6(M + GD) \sqrt{\frac{\ln(6T/\gamma)}{n}} + 19e(M + GD) \sqrt{\frac{\ln(6e/\gamma)}{n}} \\ &\quad + 2\sqrt{e}\eta G(4 + 48\sqrt{6e}G \lceil \ln(n) \rceil \ln(6e/\gamma)) \left( \sqrt{T} + \frac{\sqrt{3}T \ln(eT) \ln(6/\gamma)}{n} \right). \end{aligned}$$

*Proof of Theorem [A.9](#).* Since  $\mathcal{W}$  is bounded by  $D$ , we have  $B = B_t = D$ . Furthermore, by Lemma [A.6](#), we have  $\sup_{\mathbf{z}, \mathbf{z}'} \ell(\mathbf{w}_*, \mathbf{z}, \mathbf{z}') \leq M + GD$  and  $\sup_{\mathbf{z}, \mathbf{z}'} \ell(\mathbf{w}_t, \mathbf{z}, \mathbf{z}') \leq M + GD$ . The proof is completed by recalling the error decomposition [\(A.14\)](#), applying Corollary [A.6](#), Theorem [A.7](#) and [A.8](#) each with probability  $1 - \gamma/3$ .  $\square$

## A.3 Proof of Theorem [3](#)

**Theorem A.10** (Theorem [3](#) restated). *Suppose  $\ell$  is nonnegative, convex and  $G$ -Lipschitz. Denote  $M = \sup_{\mathbf{z}, \mathbf{z}'} \ell(0, \mathbf{z}, \mathbf{z}')$  and  $D = \|\mathbf{w}_*\|_2$ . Assume we run Algorithm [1](#) for  $T \geq n$  iterations under random selection*

with replacement rule. For any  $\gamma \in (0, 1)$ , with probability at least  $1 - \gamma$  with respect to the sample  $S$  and internal randomness of Algorithm [1](#), we have

$$\begin{aligned} R(\bar{\mathbf{w}}_T) - R(\mathbf{w}_*) &\leq \frac{2}{T} \sum_{t=1}^T (\mathcal{R}_t(\ell \circ \mathcal{W}_t) + \mathcal{R}_t(\ell \circ \mathcal{W}_D)) + \frac{D^2}{2T\eta} + \frac{\eta G^2}{2} + (6M + 3GD) \sqrt{\frac{\ln(6T/\gamma)}{n}} + 3G \sqrt{(G^2 + 2M)\eta \ln(6T/\gamma)} \\ &\quad + 2\sqrt{\epsilon}\eta G(4 + 48\sqrt{6}\epsilon G \lceil \ln(n) \rceil \ln(6e/\gamma)) \left( \sqrt{T} + \frac{\sqrt{3T \ln(eT) \ln(6/\gamma)}}{n} \right) \\ &\quad + 12\sqrt{2}\epsilon(M + G\sqrt{(G^2 + 2M)\eta T}) \sqrt{\frac{\ln(6e/\gamma)}{n}} + (M + GD) \sqrt{\frac{\ln(3/\gamma)}{n}}. \end{aligned}$$

Although the boundedness assumption on the parameter space  $\mathcal{W}$  is removed, the next lemma characterizes the bound of the iterates  $\mathbf{w}_t$  by the sum of stepsizes.

**Lemma A.10.** *Suppose  $\ell$  is nonnegative, convex and  $G$ -Lipschitz. Denote  $M = \sup_{\mathbf{z}, \mathbf{z}'} \ell(0, \mathbf{z}, \mathbf{z}')$ . Let  $\{\mathbf{w}_t\}$  be the sequence of iterates by Algorithm [1](#) with  $\eta \leq 1$ . Then*

$$\|\mathbf{w}_{t+1}\|_2^2 \leq (G^2 + 2M)\eta t.$$

*Proof.* By the update rule of Algorithm [1](#), we have

$$\begin{aligned} \|\mathbf{w}_{t+1}\|_2^2 &= \|\mathbf{w}_t - \eta \partial \hat{L}_{t+1}(\mathbf{w}_t)\|_2^2 = \|\mathbf{w}_t\|_2^2 + \eta^2 \|\partial \hat{L}_{t+1}(\mathbf{w}_t)\|_2^2 - 2\eta \langle \mathbf{w}_t, \partial \hat{L}_{t+1}(\mathbf{w}_t) \rangle \\ &\leq \|\mathbf{w}_t\|_2^2 + \eta G^2 - 2\eta \langle \mathbf{w}_t, \partial \hat{L}_{t+1}(\mathbf{w}_t) \rangle \leq \|\mathbf{w}_t\|_2^2 + \eta G^2 + 2\eta (\hat{L}_{t+1}(0) - \hat{L}_{t+1}(\mathbf{w}_t)) \\ &\leq \|\mathbf{w}_t\|_2^2 + \eta(G^2 + 2M), \end{aligned}$$

where the first inequality holds since  $\ell$  is  $G$ -Lipschitz and  $\eta \leq 1$ , the second inequality is due to the convexity of  $\ell$  and the last inequality is due to the nonnegativity of  $\ell$  and the definition of  $M$ .  $\square$

*Proof of Theorem [A.10](#).* By assumption and Lemma [A.10](#), we have  $B = D$  and  $B_t = \sqrt{(G^2 + 2M)\eta t}$ . Therefore, by Lemma [A.6](#), we also get  $\sup_{\mathbf{z}, \mathbf{z}'} \ell(\mathbf{w}_*, \mathbf{z}, \mathbf{z}') \leq M + GD$  and  $\sup_{\mathbf{z}, \mathbf{z}'} \ell(\mathbf{w}_t, \mathbf{z}, \mathbf{z}') \leq M + G\sqrt{(G^2 + 2M)\eta t}$ . The proof is completed by recalling the error decomposition ([A.14](#)), applying Corollary [A.6](#), Theorem [A.7](#) and [A.8](#) with probability  $1 - \gamma/3$  each.  $\square$

#### A.4 Proof of Theorem [5](#)

In this section, we give utility bound of Algorithm [2](#). Recall the error decomposition scheme as follows

$$\begin{aligned} \epsilon_{\text{risk}}(\mathbf{w}_{\text{priv}}) &= R(\mathbf{w}_{\text{priv}}) - R(\mathbf{w}_*) = R(\mathbf{w}_{\text{priv}}) - R(\bar{\mathbf{w}}_T) + R(\bar{\mathbf{w}}_T) - R(\mathbf{w}_*) \\ &= R(\mathbf{w}_{\text{priv}}) - R(\bar{\mathbf{w}}_T) + R(\bar{\mathbf{w}}_T) - R_S(\bar{\mathbf{w}}_T) + R_S(\bar{\mathbf{w}}_T) - R_S(\mathbf{w}_*) + R_S(\mathbf{w}_*) - R(\mathbf{w}_*). \end{aligned} \quad (\text{A.16})$$

Notice that  $R(\bar{\mathbf{w}}_T) - R(\mathbf{w}_*)$  yields similar excess risk as Theorem [A.9](#). Hence the difference here is the additional term  $R(\mathbf{w}_{\text{priv}}) - R(\bar{\mathbf{w}}_T)$  due to the added noise  $\mathbf{u}$ . The next lemma is a Chernoff type bound for the  $\ell_2$  norm of Gaussian vectors.

**Lemma A.11** (Chernoff bound for the  $\ell_2$  norm of Gaussian vector). *Let  $X_1, \dots, X_d$  be i.i.d standard Gaussian random variables and  $X = [X_1, \dots, X_d] \in \mathbb{R}^d$ . Then for any  $\tilde{\gamma} \in (0, 1)$ , with probability at least  $1 - \exp(-d\tilde{\gamma}^2/8)$  there holds  $\|X\|_2^2 \leq (1 + \tilde{\gamma})d$ .*

The next lemma tells us the error incurred by  $R(\mathbf{w}_{\text{priv}}) - R(\bar{\mathbf{w}}_T)$  is bounded by the added noise  $\mathbf{u}$ .

**Lemma A.12.** *Suppose  $\ell$  is nonnegative, convex and  $G$ -Lipschitz. Consider  $\mathbf{w}_{\text{priv}}$  and  $\bar{\mathbf{w}}_T$  from Algorithm [2](#). For any  $\gamma > 0$ , and for any  $\gamma \in (\exp(-d/8), 1)$ , with probability at least  $1 - \gamma$ , we have*

$$R(\mathbf{w}_{\text{priv}}) - R(\bar{\mathbf{w}}_T) \leq 2G\sigma\sqrt{d} \ln^{1/4}(1/\gamma).$$

*Proof.* By the definition of  $R$ , we have

$$\begin{aligned}
 R(\mathbf{w}_{\text{priv}}) - R(\bar{\mathbf{w}}_T) &= \mathbb{E}_{\mathbf{z}, \mathbf{z}'} [\ell(\mathbf{w}_{\text{priv}}, \mathbf{z}, \mathbf{z}') - \ell(\bar{\mathbf{w}}_T, \mathbf{z}, \mathbf{z}')] \\
 &\leq \mathbb{E}_{\mathbf{z}, \mathbf{z}'} [\langle \mathbf{w}_{\text{priv}} - \bar{\mathbf{w}}_T, \partial \ell(\mathbf{w}_{\text{priv}}, \mathbf{z}, \mathbf{z}') \rangle] \\
 &\leq \mathbb{E}_{\mathbf{z}, \mathbf{z}'} [\|\Pi_{\mathcal{W}}(\bar{\mathbf{w}}_T + \mathbf{u}) - \bar{\mathbf{w}}_T\|_2 \|\partial \ell(\mathbf{w}_{\text{priv}}, \mathbf{z}, \mathbf{z}')\|_2] \\
 &\leq \mathbb{E}_{\mathbf{z}, \mathbf{z}'} [\|\mathbf{u}\|_2 \|\partial \ell(\mathbf{w}_{\text{priv}}, \mathbf{z}, \mathbf{z}')\|_2] \\
 &\leq G \|\mathbf{u}\|_2
 \end{aligned} \tag{A.17}$$

where the first inequality is due to the convexity of  $\ell$ , the second inequality is by Cauchy-Schwarz inequality, the third inequality is by the non-expansiveness of projection and the last inequality is because  $\ell$  is  $G$ -Lipschitz for any  $\mathbf{w}, \mathbf{z}, \mathbf{z}'$ . Now, since  $\mathbf{u} \sim \mathcal{N}(0, \sigma^2 \mathbf{I}_d)$ , then by Lemma A.11 for  $\gamma \in (\exp(-d/8), 1)$  we have with probability  $1 - \gamma$ ,

$$\|\mathbf{u}\|_2 \leq \sigma \sqrt{d} \left( 1 + \left( \frac{8 \ln(1/\gamma)}{d} \right)^{1/4} \right).$$

Plugging the above inequality back into Equation (A.17) we get the desired result.  $\square$

**Theorem A.11** (Theorem 5 restated). *Suppose  $\ell$  is nonnegative, convex and  $G$ -Lipschitz, and  $\mathcal{W}$  is bounded with diameter  $D$ . Consider Algorithm 2 for  $T$  iterations under random selection with replacement rule. For any privacy budget  $\epsilon > 0$ , any  $\delta > 0$  and for any  $\gamma \in (\max\{4\delta, \exp(-d/8)\}, 1)$ , with probability at least  $1 - \gamma$ , we have*

$$\begin{aligned}
 R(\mathbf{w}_{\text{priv}}) - R(\mathbf{w}_*) &\leq \frac{4}{T} \sum_{t=1}^T \mathcal{R}_t(\ell \circ \mathcal{W}) + \frac{D^2}{2T\eta} + \frac{\eta G^2}{2} + 6(M + GD) \sqrt{\frac{\ln(8T/\gamma)}{n}} + 19e(M + GD) \sqrt{\frac{\ln(8e/\gamma)}{n}} \\
 &+ 2\sqrt{e}G\eta \left( 4 + 48\sqrt{6}G \lceil \ln(n) \rceil \ln(8e/\gamma) \right) \left( \sqrt{T} + \frac{\sqrt{3T} \ln(eT) \ln(2/\delta)}{n} \right) + 2G\sigma\sqrt{d} \ln^{1/4}(4/\gamma).
 \end{aligned}$$

*Proof.* For any neighborhood datasets  $S$  and  $S'$ , Theorem 1 implies with probability least  $1 - \delta/2$  that

$$\|\bar{\mathbf{w}}_T - \bar{\mathbf{w}}'_T\|_2 \leq 2\sqrt{e}G\eta \left( \sqrt{T} + \frac{\sqrt{3T} \ln(eT) \ln(2/\delta)}{n} \right). \tag{A.18}$$

Since  $\gamma \geq 4\delta$ , we know the (A.18) holds with probability at least  $1 - \gamma/8$ . Applying Corollary A.6 with (A.18) we know with probability at least  $1 - \gamma/4$  we have

$$\begin{aligned}
 R(\bar{\mathbf{w}}_T) - R_S(\bar{\mathbf{w}}_T) &\leq 2\sqrt{e}G\eta \left( 4 + 48\sqrt{6}G \lceil \ln(n) \rceil \ln(8e/\gamma) \right) \left( \sqrt{T} + \frac{\sqrt{3T} \ln(eT) \ln(2/\delta)}{n} \right) \\
 &+ 12\sqrt{2}e(M + GD) \sqrt{\frac{\ln(8e/\gamma)}{n}}.
 \end{aligned} \tag{A.19}$$

Recalling the error decomposition (6) and applying Theorem A.7, Theorem A.8 and Lemma A.12 each with probability  $1 - \gamma/4$  together with (A.19), we have the desired bound.  $\square$

## A.5 Rademacher Complexity for AUC Maximization and Similarity Metric Learning

Firstly we look at the Rademacher complexity for AUC maximization.

**Lemma A.13.** *Given the parameter space  $\mathcal{W} = \{\mathbf{w} \in \mathbb{R}^d \mid \|\mathbf{w}\|_2 \leq D\}$ , and denote  $\kappa = \sup_{\mathbf{x}} \|\mathbf{x}\|_2$ . the Rademacher complexity of  $\mathcal{H} = \{h_{\mathbf{w}} \mid \mathbf{w} \in \mathcal{W}\}$  can be upper bounded by  $R_t(\mathcal{H}) \leq \frac{2D\kappa}{\sqrt{t}}$ .*

*Proof.* Starting with the definition, the Rademacher complexity can be upper bounded by

$$\begin{aligned}
 R_t(\mathcal{H}) &= \frac{1}{n} \sum_{i=1}^n \mathbb{E} \left[ \sup_{h \in \mathcal{H}} \frac{1}{t} \sum_{k=1}^t \sigma_k h_{\mathbf{w}}(\mathbf{x}_i, \mathbf{x}_{i_k}) \right] = \frac{1}{n} \sum_{i=1}^n \mathbb{E} \left[ \sup_{\mathbf{w} \in \mathcal{W}_t} \frac{1}{t} \sum_{k=1}^t \sigma_k \langle \mathbf{w}, \mathbf{x}_i - \mathbf{x}_{i_k} \rangle \right] \\
 &\leq \frac{1}{n} \sum_{i=1}^n \mathbb{E} \left[ \sup_{\mathbf{w} \in \mathcal{W}_t} \|\mathbf{w}\|_2 \left\| \frac{1}{t} \sum_{k=1}^t \sigma_k (\mathbf{x}_i - \mathbf{x}_{i_k}) \right\|_2 \right] \leq \frac{D}{nt} \sum_{i=1}^n \left( \mathbb{E} \left[ \left\| \sum_{k=1}^t \sigma_k (\mathbf{x}_i - \mathbf{x}_{i_k}) \right\|_2^2 \right] \right)^{\frac{1}{2}} \\
 &= \frac{D}{nt} \sum_{i=1}^n \left( \sum_{k=1}^t \mathbb{E} \left[ \|\mathbf{x}_i - \mathbf{x}_{i_k}\|_2^2 \right] \right)^{\frac{1}{2}} \leq \frac{2D\kappa}{\sqrt{t}}
 \end{aligned}$$

where the first inequality is due to Cauchy-Schwarz inequality, the third identity is due to  $\{\sigma_k\}_{k=1}^t$  are independent random variables with mean zero.  $\square$

Next we turn our focus to similarity metric learning.

**Lemma A.14.** Consider the parameter space defined via the nuclear norm  $\mathcal{W} = \{\mathbf{w} \in \mathbb{R}^{d \times d}, \|\mathbf{w}\|_{S_1} \leq D\}$ , where  $\|\mathbf{w}\|_{S_1}$  denotes the nuclear norm of a matrix  $\mathbf{w}$ . The complexity of  $\mathcal{H} = \{h_{\mathbf{w}} : \mathbf{w} \in \mathcal{W}\}$  is bounded by

$$R_t(\mathcal{H}) = \mathcal{O} \left( \frac{D \|\mathbb{E}[\|X\|_2^2 X X^\top]\|_{S_\infty}^{\frac{1}{2}} \sqrt{\log d}}{\sqrt{t}} \right), \quad (\text{A.20})$$

where  $\|\cdot\|_{S_\infty}$  denotes the largest singular value.

*Proof.* The complexity of  $\mathcal{H} = \{h_{\mathbf{w}} : \mathbf{w} \in \mathcal{W}\}$  is bounded by

$$\begin{aligned}
 R_t(\mathcal{H}) &= \frac{1}{n} \sum_{i=1}^n \mathbb{E} \left[ \sup_{\mathbf{w} \in \mathcal{W}} \frac{1}{t} \sum_{k=1}^t \sigma_k \langle \mathbf{w}, (\mathbf{x}_i - \mathbf{x}_{i_k})(\mathbf{x}_i - \mathbf{x}_{i_k})^\top \rangle \right] \leq \frac{1}{n} \sum_{i=1}^n \mathbb{E} \left[ \sup_{\mathbf{w} \in \mathcal{W}} \|\mathbf{w}\|_{S_1} \left\| \frac{1}{t} \sum_{k=1}^t \sigma_k (\mathbf{x}_i - \mathbf{x}_{i_k})(\mathbf{x}_i - \mathbf{x}_{i_k})^\top \right\|_{S_\infty} \right] \\
 &\leq \frac{D}{nt} \sum_{i=1}^n \mathbb{E} \left[ \left\| \sum_{k=1}^t \sigma_k (\mathbf{x}_i - \mathbf{x}_{i_k})(\mathbf{x}_i - \mathbf{x}_{i_k})^\top \right\|_{S_\infty} \right] = \mathcal{O} \left( \frac{D \|\mathbb{E}[\|X\|_2^2 X X^\top]\|_{S_\infty}^{\frac{1}{2}} \sqrt{\log d}}{\sqrt{t}} \right),
 \end{aligned}$$

where  $\|\cdot\|_{S_\infty}$  denotes the largest singular value of a matrix and we have used Lemma A.17 in the last step.  $\square$

For any  $p \geq 1$ , the Schatten- $p$  norm of a matrix  $W \in \mathbb{R}^{d \times d}$  is defined as the  $\ell_p$ -norm of the vector of singular values  $\sigma(W) := (\sigma_1(W), \dots, \sigma_d(W))^\top$  (the singular values are assumed to be sorted in non-increasing order), i.e.,  $\|W\|_{S_p} := \|\sigma(W)\|_p$ . Let  $\Sigma = \mathbb{E}[X X^\top]$ . We assume  $d \geq 3$ .

The following Khintchine-Kahane inequality [Lust-Piquard and Pisier \(1991\)](#) provides a powerful tool to control the  $q$ -th norm of the summation of Rademacher series. The following form can be found in [Qiu and Wicks \(2014\)](#).

**Lemma A.15** (Matrix Khintchine). Let  $X_1, \dots, X_n$  be a set of symmetric matrices of the same dimension and let  $\sigma_1, \dots, \sigma_n$  be a sequence of independent Rademacher random variables. For all  $q \geq 2$ ,

$$\left( \mathbb{E}_\sigma \left\| \sum_{i=1}^n \sigma_i X_i \right\|_{S_q}^q \right)^{\frac{1}{q}} \leq 2^{-\frac{1}{4}} \sqrt{\frac{q\pi}{e}} \left\| \left( \sum_{i=1}^n X_i^2 \right)^{\frac{1}{2}} \right\|_{S_q}. \quad (\text{A.21})$$

The following inequality is the Bernstein inequality for a summation of independent matrices [Tropp \(2015\)](#).

**Lemma A.16** (Matrix Bernstein). Let  $Z_1, \dots, Z_n$  be independent, mean-zero and symmetric random matrices in  $\mathbb{R}^{d \times d}$ . Assume that each one is uniformly bounded

$$\mathbb{E}[Z_i] = 0 \quad \text{and} \quad \|Z_i\|_{S_\infty} \leq L \quad \text{for each } i = 1, \dots, n.$$

Introduce the sum  $S = \sum_{i=1}^n Z_i$  and let  $v(S)$  denote the matrix variance statistic of the sum

$$v(S) = \left\| \sum_{i=1}^n \mathbb{E}[Z_i^2] \right\|_{S_\infty}.$$

Then

$$\mathbb{E}[\|S\|_{S_\infty}] \leq \sqrt{2v(S) \log(2d)} + \frac{L}{3} \log(2d).$$

**Lemma A.17.** Let  $\sigma_1, \dots, \sigma_n$  be independent Rademacher variables. Then

$$\frac{1}{n} \mathbb{E} \left\| \sum_{i=1}^n \sigma_i \mathbf{x}_i \mathbf{x}_i^\top \right\|_{S_\infty} \leq 2^{\frac{1}{4}} \sqrt{\pi \log d} \left( \frac{\sqrt{\log(2d)} \sup_{\mathbf{x}} \|\mathbf{x}\|_2^2}{n} + \frac{2 \|\mathbb{E}[\|X\|_2^2 X X^\top]\|_{S_\infty}^{\frac{1}{2}}}{\sqrt{n}} \right). \quad (\text{A.22})$$

Under the mild assumption  $\sqrt{\log(2d)} \sup_{\mathbf{x}} \|\mathbf{x}\|_2^2 \leq \sqrt{n} \|\mathbb{E}[\|X\|_2^2 X X^\top]\|_{S_\infty}^{\frac{1}{2}}$  we get

$$\frac{1}{n} \mathbb{E} \left\| \sum_{i=1}^n \sigma_i \mathbf{x}_i \mathbf{x}_i^\top \right\|_{S_\infty} = \mathcal{O} \left( \frac{\sqrt{\log d} \|\mathbb{E}[\|X\|_2^2 X X^\top]\|_{S_\infty}^{\frac{1}{2}}}{\sqrt{n}} \right).$$

*Proof.* By the concavity of the square-root function, we know

$$\begin{aligned} \mathbb{E}_\sigma \left\| \sum_{i=1}^n \sigma_i \mathbf{x}_i \mathbf{x}_i^\top \right\|_{S_\infty} &\leq \left( \mathbb{E}_\sigma \left\| \sum_{i=1}^n \sigma_i \mathbf{x}_i \mathbf{x}_i^\top \right\|_{S_q}^q \right)^{\frac{1}{q}} \leq 2^{-\frac{1}{4}} \sqrt{\frac{q\pi}{e}} \left\| \left( \sum_{i=1}^n \mathbf{x}_i \mathbf{x}_i^\top \mathbf{x}_i \mathbf{x}_i^\top \right)^{\frac{1}{2}} \right\|_{S_q} \\ &\leq 2^{-\frac{1}{4}} \sqrt{\frac{q\pi}{e}} d^{\frac{1}{q}} \left\| \left( \sum_{i=1}^n \mathbf{x}_i \mathbf{x}_i^\top \mathbf{x}_i \mathbf{x}_i^\top \right)^{\frac{1}{2}} \right\|_{S_\infty}, \end{aligned}$$

where we have used Lemma [A.15](#) and  $\|W\|_{S_\infty} \leq \|W\|_{S_q} \leq d^{\frac{1}{q}} \|W\|_{S_\infty}$  for all  $W \in \mathbb{R}^{d \times d}$ . If we choose  $q = 2 \log d$  ( $d \geq 3$ ), then

$$\sqrt{q} d^{\frac{1}{q}} = \sqrt{2 \log d} d^{\frac{1}{2 \log d}} = \sqrt{2e \log d}$$

and therefore

$$\mathbb{E}_\sigma \left\| \sum_{i=1}^n \sigma_i \mathbf{x}_i \mathbf{x}_i^\top \right\|_{S_\infty} \leq 2^{\frac{1}{4}} \sqrt{\pi \log d} \left\| \left( \sum_{i=1}^n \mathbf{x}_i \mathbf{x}_i^\top \mathbf{x}_i \mathbf{x}_i^\top \right)^{\frac{1}{2}} \right\|_{S_\infty} = 2^{\frac{1}{4}} \sqrt{\pi \log d} \left( \left\| \sum_{i=1}^n \mathbf{x}_i \mathbf{x}_i^\top \mathbf{x}_i \mathbf{x}_i^\top \right\|_{S_\infty} \right)^{\frac{1}{2}}.$$

It then follows from the concavity of the square-root function that

$$\mathbb{E} \left\| \sum_{i=1}^n \sigma_i \mathbf{x}_i \mathbf{x}_i^\top \right\|_{S_\infty} \leq 2^{\frac{1}{4}} \sqrt{\pi \log d} \left( \mathbb{E} \left\| \sum_{i=1}^n \mathbf{x}_i \mathbf{x}_i^\top \mathbf{x}_i \mathbf{x}_i^\top \right\|_{S_\infty} \right)^{\frac{1}{2}} \quad (\text{A.23})$$

It is clear

$$\begin{aligned} \mathbb{E} \left[ \left\| \sum_{i=1}^n \mathbf{x}_i \mathbf{x}_i^\top \mathbf{x}_i \mathbf{x}_i^\top \right\|_{S_\infty} \right] &\leq \mathbb{E} \left[ \left\| \sum_{i=1}^n \mathbf{x}_i \mathbf{x}_i^\top \mathbf{x}_i \mathbf{x}_i^\top - \mathbb{E} \sum_{i=1}^n \mathbf{x}_i \mathbf{x}_i^\top \mathbf{x}_i \mathbf{x}_i^\top \right\|_{S_\infty} \right] + \left\| \mathbb{E} \sum_{i=1}^n \mathbf{x}_i \mathbf{x}_i^\top \mathbf{x}_i \mathbf{x}_i^\top \right\|_{S_\infty} \\ &= \mathbb{E} \left[ \left\| \sum_{i=1}^n \mathbf{x}_i \mathbf{x}_i^\top \mathbf{x}_i \mathbf{x}_i^\top - \mathbb{E} \sum_{i=1}^n \mathbf{x}_i \mathbf{x}_i^\top \mathbf{x}_i \mathbf{x}_i^\top \right\|_{S_\infty} \right] + n \left\| \mathbb{E}[\|X\|_2^2 X X^\top] \right\|_{S_\infty}. \end{aligned} \quad (\text{A.24})$$

For all  $i \in [n]$ , denote  $Z_i = \|\mathbf{x}_i\|_2^2 \mathbf{x}_i \mathbf{x}_i^\top - \mathbb{E}[\|\mathbf{x}_i\|_2^2 \mathbf{x}_i \mathbf{x}_i^\top]$ . It is clear that

$$\begin{aligned} \mathbb{E} \left[ \sum_{i=1}^n Z_i^2 \right] &= \sum_{i=1}^n \mathbb{E} \left[ \|\mathbf{x}_i\|_2^6 \mathbf{x}_i \mathbf{x}_i^\top \right] - \sum_{i=1}^n \left( \mathbb{E}[\|\mathbf{x}_i\|_2^2 \mathbf{x}_i \mathbf{x}_i^\top] \right) \left( \mathbb{E}[\|\mathbf{x}_i\|_2^2 \mathbf{x}_i \mathbf{x}_i^\top] \right) \\ &= n \mathbb{E}[\|X\|_2^6 X X^\top] - n \mathbb{E}[\|X\|_2^2 X X^\top] \mathbb{E}[\|X\|_2^2 X X^\top] \preceq n \mathbb{E}[\|X\|_2^6 X X^\top] \end{aligned}$$



and therefore

$$\left\| \mathbb{E} \left[ \sum_{i=1}^n Z_i^2 \right] \right\|_{S_\infty} \leq n \left\| \mathbb{E} [\|X\|_2^6 X X^\top] \right\|_{S_\infty}. \quad (\text{A.25})$$

Furthermore,

$$\|Z_i\|_{S_\infty} \leq \sup_{\mathbf{x}_i} \|\mathbf{x}_i \mathbf{x}_i^\top \mathbf{x}_i \mathbf{x}_i^\top\|_{S_\infty} \leq \sup_{\mathbf{x}} \|\mathbf{x}\|_2^4. \quad (\text{A.26})$$

We can apply Lemma [A.16](#) with the above bound of variance [\(A.25\)](#) and magnitude [\(A.26\)](#), and derive

$$\mathbb{E} \left[ \left\| \sum_{i=1}^n Z_i \right\|_{S_\infty} \right] \leq \sqrt{2n \left\| \mathbb{E} [\|X\|_2^6 X X^\top] \right\|_{S_\infty} \log(2d)} + \frac{1}{3} \sup_{\mathbf{x}} \|\mathbf{x}\|_2^4 \log(2d).$$

This together with the sub-additivity of the square-root function and [\(A.24\)](#) implies

$$\begin{aligned} & \left( \mathbb{E} \left[ \left\| \sum_{i=1}^n \mathbf{x}_i \mathbf{x}_i^\top \mathbf{x}_i \mathbf{x}_i^\top \right\|_{S_\infty} \right] \right)^{\frac{1}{2}} \\ & \leq \left( \mathbb{E} \left[ \left\| \sum_{i=1}^n \mathbf{x}_i \mathbf{x}_i^\top \mathbf{x}_i \mathbf{x}_i^\top - \mathbb{E} \sum_{i=1}^n \mathbf{x}_i \mathbf{x}_i^\top \mathbf{x}_i \mathbf{x}_i^\top \right\|_{S_\infty} \right] \right)^{\frac{1}{2}} + \left( n \left\| \mathbb{E} [\|X\|_2^2 X X^\top] \right\|_{S_\infty} \right)^{\frac{1}{2}} \\ & \leq (2n \left\| \mathbb{E} [\|X\|_2^6 X X^\top] \right\|_{S_\infty} \log(2d))^{\frac{1}{4}} + \frac{\sqrt{\log(2d)}}{\sqrt{3}} \sup_{\mathbf{x}} \|\mathbf{x}\|_2^2 + \sqrt{n \left\| \mathbb{E} [\|X\|_2^2 X X^\top] \right\|_{S_\infty}}. \end{aligned}$$

We plug the above inequality back into [\(A.23\)](#), and get the inequality

$$\begin{aligned} \frac{1}{n} \mathbb{E} \left\| \sum_{i=1}^n \sigma_i \mathbf{x}_i \mathbf{x}_i^\top \right\|_{S_\infty} & \leq 2^{\frac{1}{4}} \sqrt{\pi \log d} \left( (2 \log(2d))^{\frac{1}{4}} n^{-\frac{3}{4}} \left\| \mathbb{E} [\|X\|_2^6 X X^\top] \right\|_{S_\infty}^{\frac{1}{4}} \right. \\ & \quad \left. + \frac{\sqrt{\log(2d)} \sup_{\mathbf{x}} \|\mathbf{x}\|_2^2}{\sqrt{3n}} + \frac{\left\| \mathbb{E} [\|X\|_2^2 X X^\top] \right\|_{S_\infty}^{\frac{1}{2}}}{\sqrt{n}} \right). \quad (\text{A.27}) \end{aligned}$$

It is clear that

$$\left\| \mathbb{E} [\|X\|_2^6 X X^\top] \right\|_{S_\infty}^{\frac{1}{4}} \leq \sup_{\mathbf{x}} \|\mathbf{x}\|_2 \left\| \mathbb{E} [\|X\|_2^2] X X^\top \right\|_{S_\infty}^{\frac{1}{4}}.$$

This together with Cauchy-Schwartz inequality shows that

$$(2 \log(2d))^{\frac{1}{4}} n^{-\frac{3}{4}} \left\| \mathbb{E} [\|X\|_2^6 X X^\top] \right\|_{S_\infty}^{\frac{1}{4}} \leq \frac{\left\| \mathbb{E} [\|X\|_2^2 X X^\top] \right\|_{S_\infty}^{\frac{1}{2}}}{\sqrt{n}} + \frac{\sqrt{\log(2d)} \sup_{\mathbf{x}} \|\mathbf{x}\|_2^2}{2^{\frac{3}{2}} n}.$$

Plugging the above inequality back into [\(A.27\)](#) gives the stated bound [\(A.22\)](#) ( $2^{-\frac{3}{2}} + 3^{-\frac{1}{2}} < 1$ ). The proof is complete.  $\square$
